# Supplementary material
Source: PubMed Central journal article supplement (PMC9772098)
Supplement: NIHMS1843719-supplement-1.pdf [file NIHMS1843719-supplement-1.pdf]

## Supplemental Figures

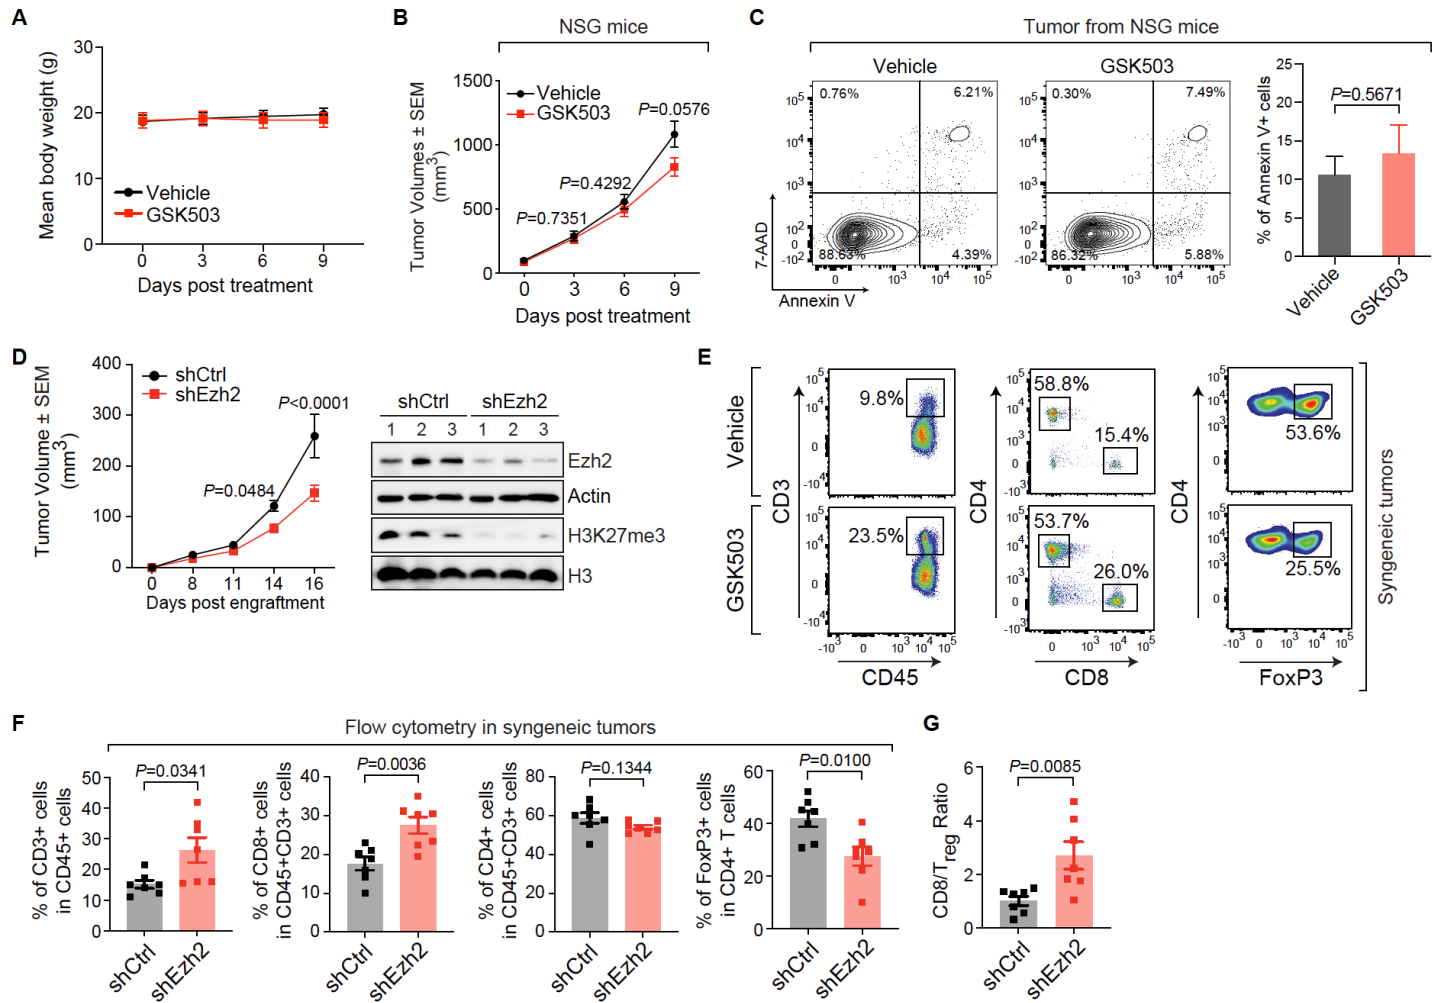

**Fig. S1. Depletion of Ezh2 in ER $\alpha$ -positive (ER $\alpha$ +) breast cancer cells retards tumor growth and induces an antitumor microenvironment in immunocompetent mice.** (A) Body weights of 67NR-derived syngeneic BALB/c mice receiving vehicle or 150 mg/kg GSK503 over the treatment period (n=12 per group). (B-C) Growth (n=10 per group, B) and Annexin V/7-amino-actinomycin (AAD) staining (n=3 per group, C) of allograft tumors developed by injecting 67NR cells into NSG mice followed by the treatment with vehicle or 150 mg/kg GSK503. Left and right panels in (C), representative density plots and quantification of Annexin V-positive (Annexin V+) cells in total cells analyzed in flow cytometry, respectively. (D) Growth (left panel, n=7 per group) and immunoblotting analysis (right panel) of breast tumors developed by injecting 67NR clones stably expressing control shRNA (shCtrl) or Ezh2-specific shRNA (shEzh2) in immunocompetent BALB/c mice. Numbers in right panel, three independent allograft tumors. (E) Density plots from the flow cytometry analysis of T cells with specified markers in the allograft tumors treated with vehicle or 150 mg/kg GSK503. (F-G) Quantification of flow cytometry results showing proportions of T cells with specified markers (F) and ratios of CD8<sup>+</sup> T cells to Treg cells (G) in allograft tumors expressing control shRNA (shCtrl) or Ezh2-targeting shRNA (shEzh2).

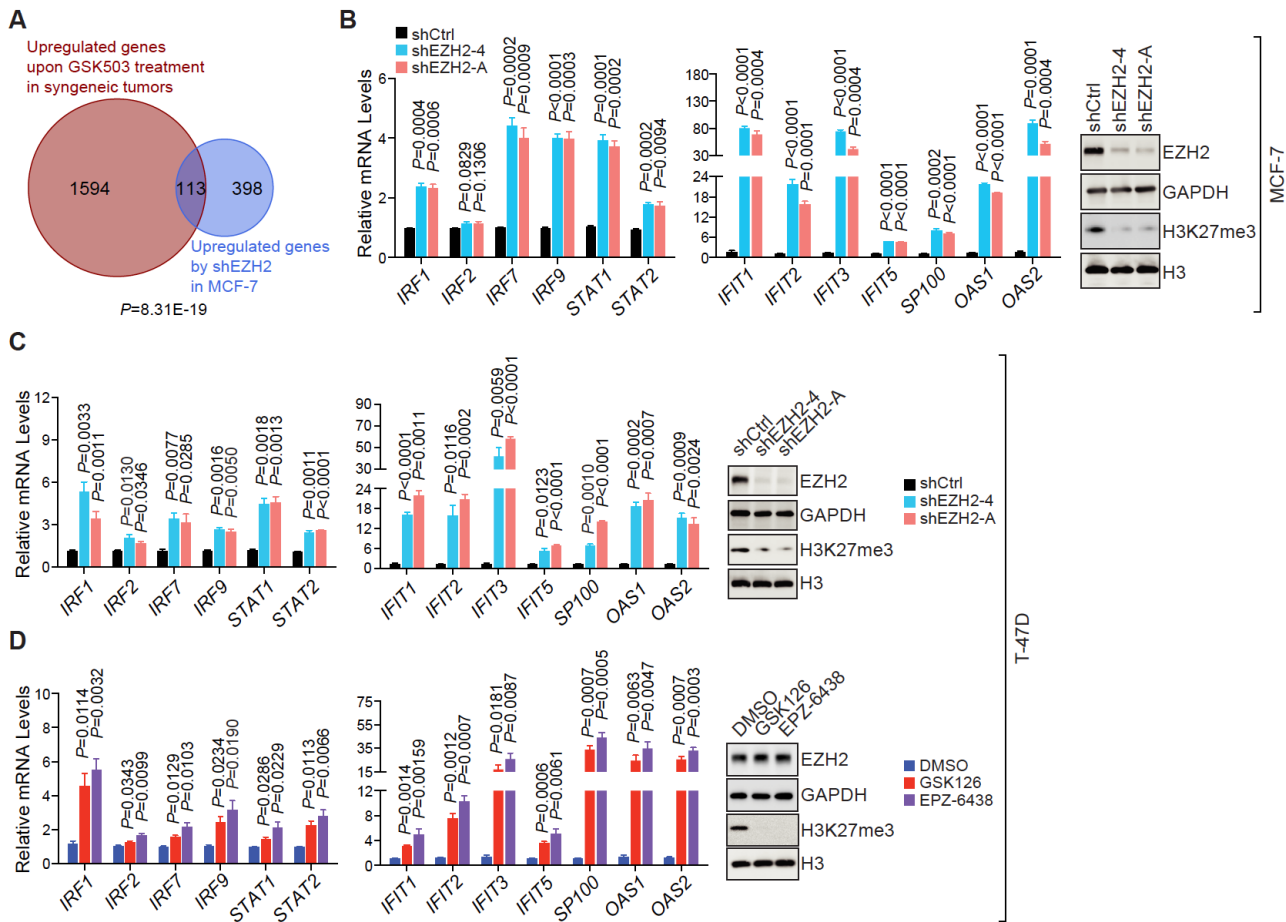

**Fig. S2. EZH2 inhibition increases the expression of interferon-stimulated genes (ISGs) in ER $\alpha$ + breast cancer cells.**

(A) Venn diagram showing the overlaps between genes upregulated by EZH2 inhibitor (GSK503) in 67NR-derived syngeneic mouse model and EZH2 knockdown (shEZH2) in MCF-7 cells. (B-D) Expression of paradigm ISGs (left panel) and immunoblotting analysis (right panel) in MCF-7 (B) and T-47D (C) cells that were infected with control shRNA (shCtrl) or two independent shRNAs targeting EZH2 (shEZH2-4 and -A) or in T-47D cells that were treated with DMSO or 5  $\mu$ M EZH2 inhibitor (GSK126 and EPZ-6438) for 7 days (D).

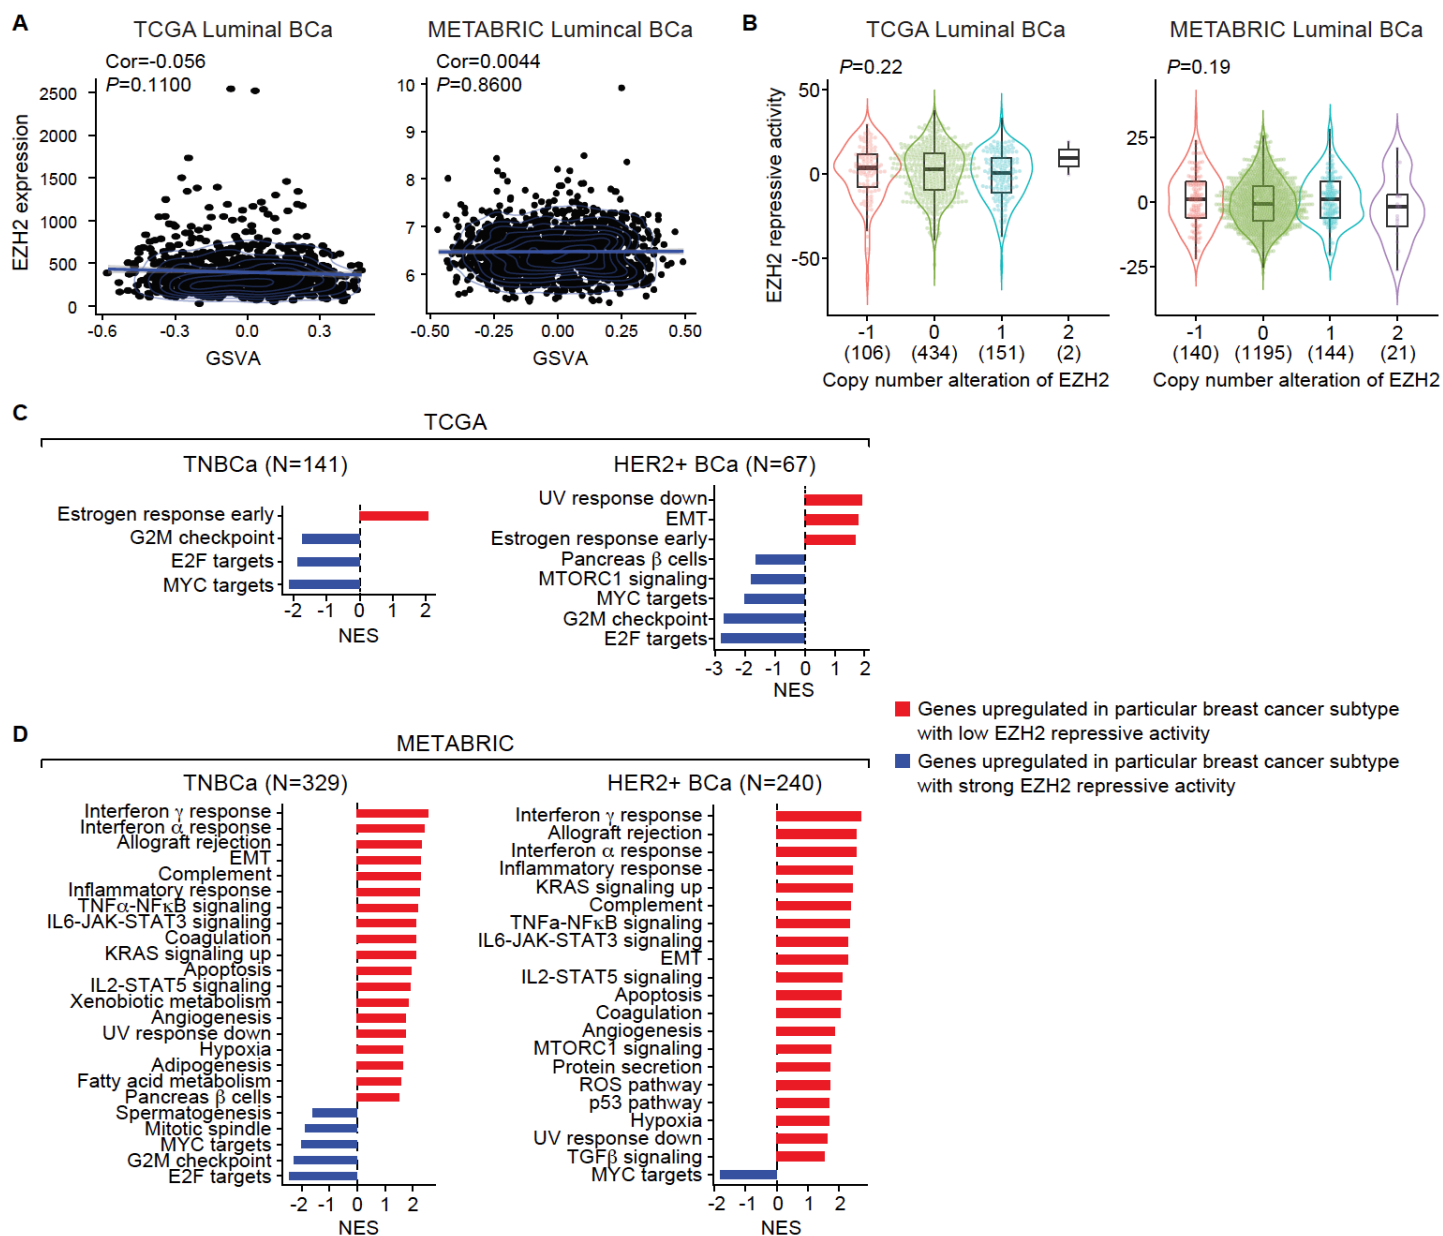

**Fig. S3. Association between the repressive activity of EZH2 and interferon signaling is verified in different subtypes of breast cancer.** (A) Correlation between the Gene Set Variation Analysis (GSVA) scores of the 53 signature genes representing EZH2 repressive activity and the expression of EZH2 gene in patients with luminal breast cancer (BCa) in the TCGA (1) and METABRIC (2) dataset. Correlation coefficients (Cor) were determined by Pearson correlation. (B) Violin plots showing GSVAscores of the 53 signature genes reflecting the repressive activity of EZH2 in four groups of ER $\alpha$ + breast cancer (Luminal BCa) with specified copy-number levels of EZH2 gene (-1, 0, 1 and 2) in the TCGA (1) and METABRIC (2) datasets. Numbers in brackets, patient numbers in each group. (C-D) Cancer hallmarks enriched in genes that are upregulated in breast cancer with weak EZH2 repressive activity (red bars) or in those with strong EZH2 repressive activity (blue bars). Data were retrieved from the TCGA (1) (C) and METABRIC (2) (D) datasets and only HER2-positive (HER2+ BCa) or triple-negative (TNBCa) breast cancer was considered. NES, normalized enrichment score; N in brackets, numbers of patients with particular subtype of breast cancer in specified dataset.

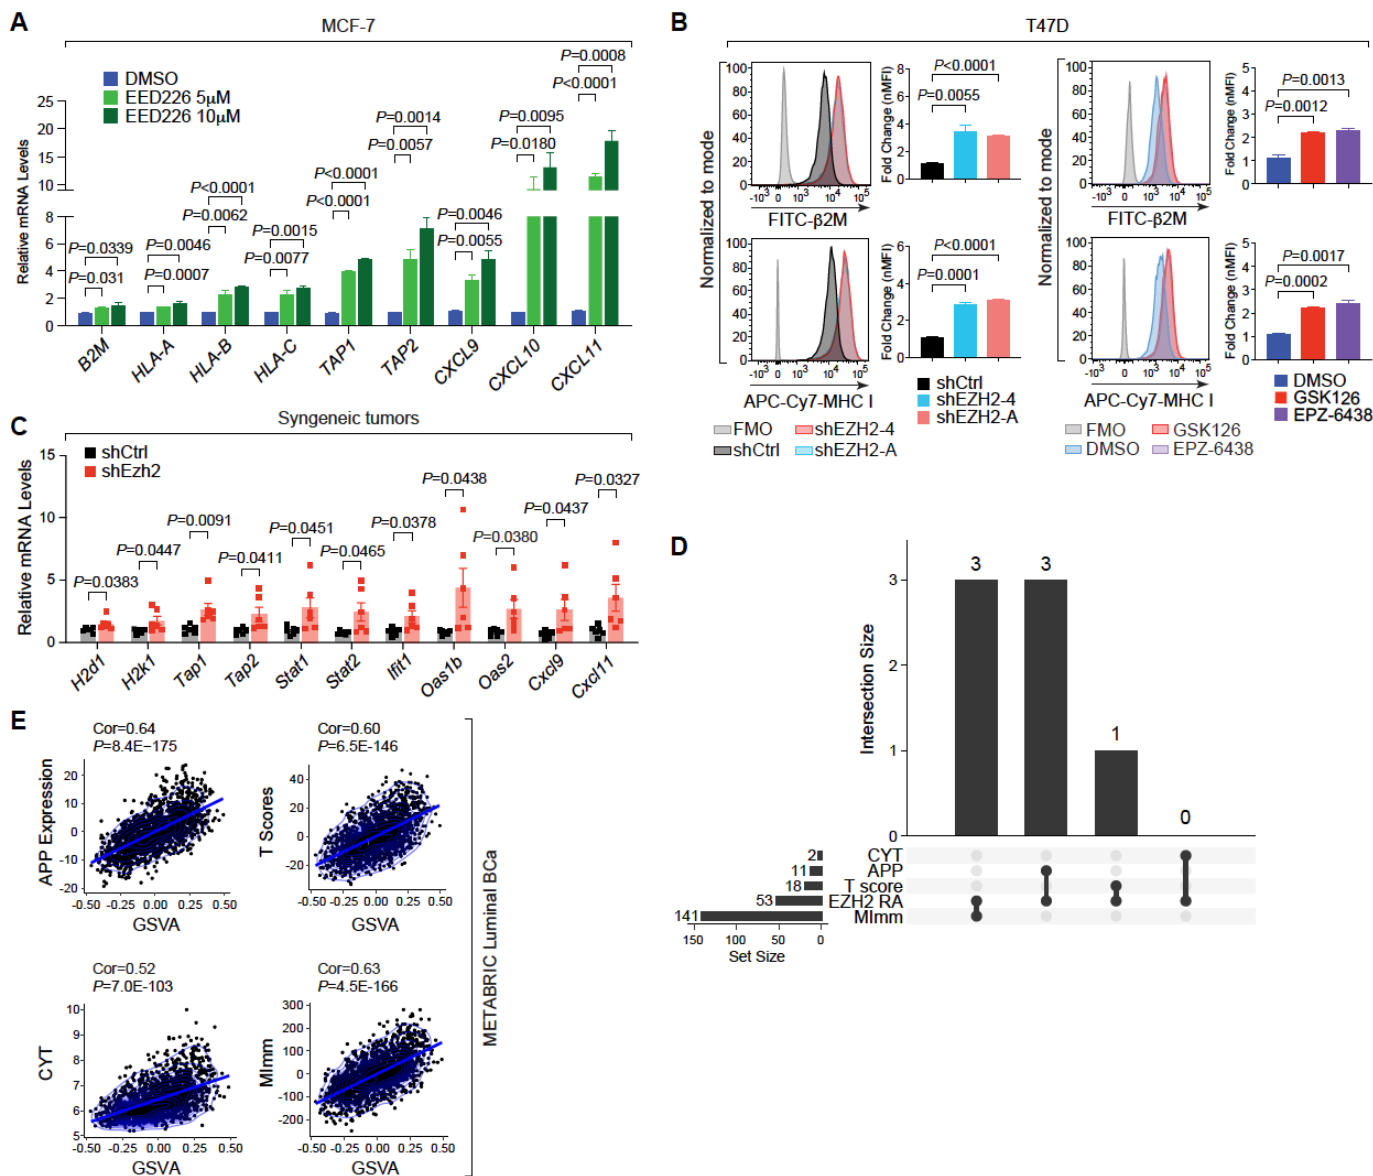

**Fig. S4. PRC2 inhibition de-represses the downstream target genes of the IFN signaling that play important roles in immune surveillance.** (A) Expression of IFN-responsive genes that encode antigen processing and presentation (APP) molecules or chemokines in MCF-7 cells upon 5 or 10  $\mu\text{M}$  EED2226 treatment for 7 days. (B) Representative histograms of flow cytometry analysis and quantification of normalized mean fluorescence intensity (nMFI) showing the surface levels of MHC class-I (MHC I) and  $\beta\text{2M}$  proteins in T-47D cells upon EZH2 knockdown (shEZH2-4 and -A, left panel) or 5  $\mu\text{M}$  EZH2 inhibitor (GSK126 and EPZ-6438) treatment for 7 days (right panels). (C) Expression of IFN-activated, immune-related genes in 67NR-derived allograft tumors expressing control shRNA (shCtrl) or Ezh2-specific shRNA (shEzh2). (D) Overlaps between the 53 signature genes we identified to reflect the repressive activity of EZH2 (EZH2 RA) and the signature genes used to calculate the scores that are associated with active immune responses. Lists of signature genes that were overlapped are indicated by the black dots and vertical lines. Numbers on top of the vertical bars, overlapped genes between the sets of signature genes compared; numbers on top of the horizontal bars, sizes of individual sets of signature genes. (E) Correlation between EZH2 repressive activity represented by the GSVAs scores of the 53 signature genes and the expression of APP genes, T scores, CYT scores or MImm scores in patients with luminal breast cancer (Luminal BCa). Clinical information was retrieved from the METABRIC (2) dataset. Correlation coefficients (Cor) were determined by Pearson correlation.

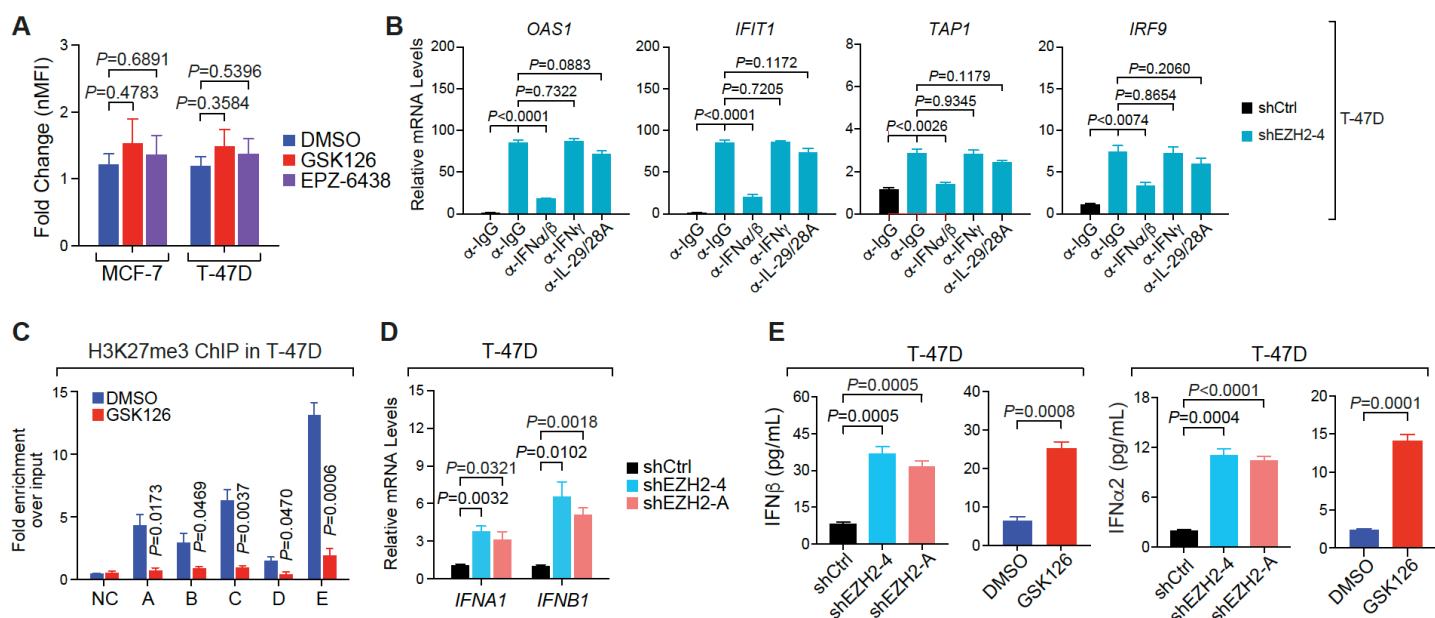

**Fig. S5. Type I ligands are transcriptionally suppressed by EZH2-mediated H3K27me3.** (A) Quantification of the expression of double-stranded RNAs by flow cytometry analysis, presented as the relative normalized mean fluorescence intensity (nMFI), in MCF-7 and T-47D cells treated with DMSO or 5  $\mu$ M EZH2 inhibitor (GSK126 and EPZ-6438) for 7 days. (B) Expression of specified genes in T-47D cells treated with 2.5  $\mu$ g/mL IgG isotype control antibody ( $\alpha$ -IgG) or 2.5  $\mu$ g/mL neutralizing antibodies against type I ( $\alpha$ -IFN $\alpha/\beta$ ), 2  $\mu$ g/mL against type II ( $\alpha$ -IFN $\gamma$ ) and 4  $\mu$ g/mL against type III ( $\alpha$ -IL29/28A) IFN ligands for 24 hours. (C) ChIP of H3K27me3 at five representative chromatin sites we designated across type I IFN gene cluster in T-47D cells treated with DMSO or 5  $\mu$ M GSK126 for 7 days. (D) Expression of *IFNA1* and *IFNB1* genes in T-47D cells stably expressing control shRNA (shCtrl) or two separate EZH2-specific shRNAs (shEZH2-4 and -A). (E) Measurement of secreted IFN $\beta$  and IFN $\alpha$ 2 protein levels by ELISA in the culture medium of T-47D cells upon EZH2 knockdown (shEZH2-4 and -A) or 5  $\mu$ M GSK126 treatment for 7 days.

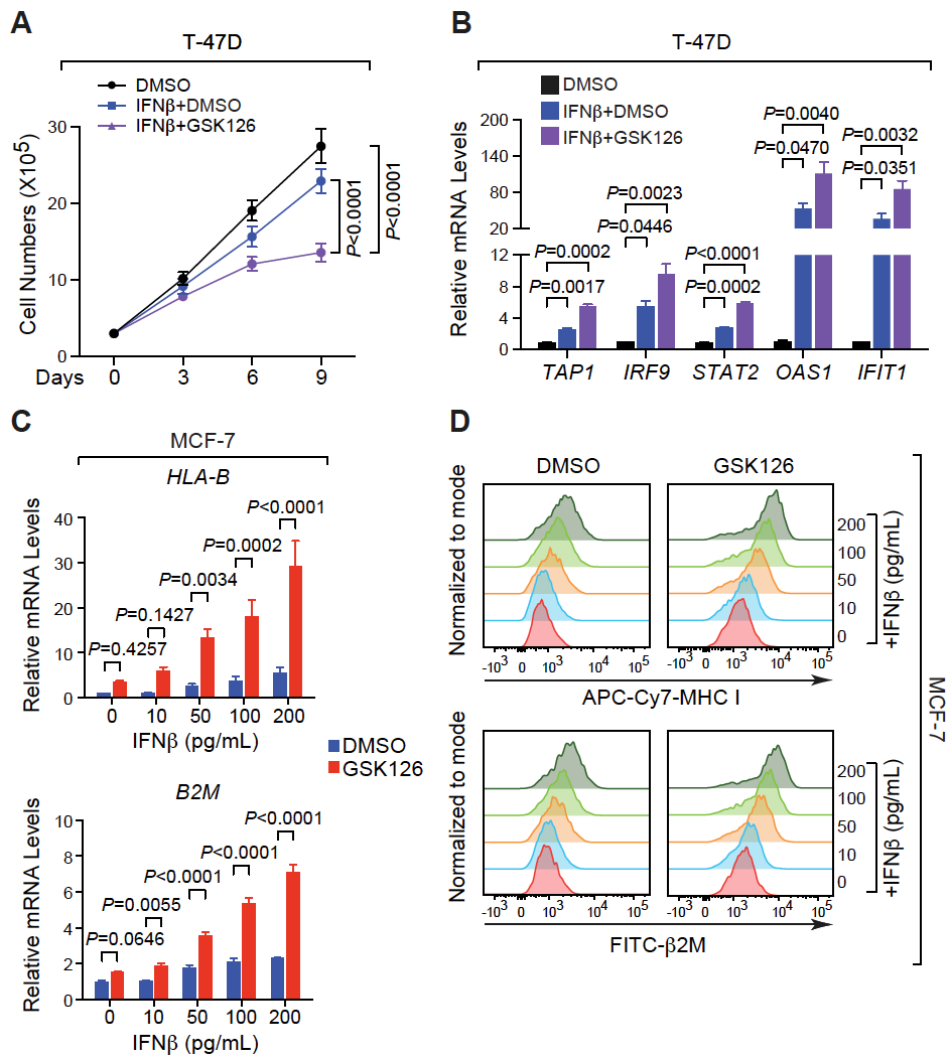

**Fig. S6. Inhibition of EZH2 potentiates the antineoplastic and immunomodulatory effects of type I IFN signaling.** (A-B) Growth (A) and expression of selected ISGs (B) in T-47D cells treated with 200 pg/mL IFN $\beta$ , either alone or with 3  $\mu$ M GSK126, for indicated period of time (A) or for 9 days (B). (C-D) Expression of HLA-B and  $\beta$ 2M genes (C) and flow cytometry analysis of the MHC class-I (MHC I) and  $\beta$ 2M proteins on the cell surface (D) in MCF-7 pretreated with 5  $\mu$ M GSK126 for 8 days and then incubated with IFN $\beta$  at indicated concentrations for 24 hours.

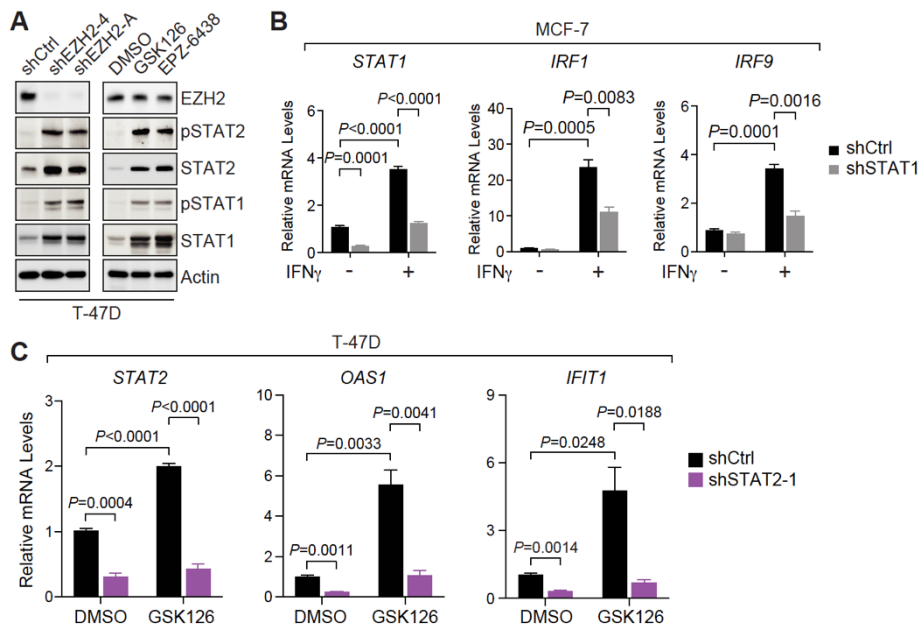

**Fig. S7. STAT1 is dispensable for the type I IFN signaling that is activated upon EZH2 inhibition.**

(A) Immunoblotting analysis in T-47D cells upon EZH2 knockdown (shEZH2-4 and -A) or upon treatment with 5  $\mu$ M EZH2 inhibitors (GSK126 and EPZ-6438) for 8 days. (B) Expression of indicated genes in control (shCtrl) and STAT1-knockdown (shSTAT1) MCF-7 cells upon treatment with (+) or without (-) 10  $\mu$ g/mL IFN $\gamma$  for 24 hours. (C) Expression of indicated genes in control (shCtrl) and STAT2-knockdown (shSTAT2-1) T-47D cells upon treatment with DMSO or 5  $\mu$ M GSK126 for 7 days.

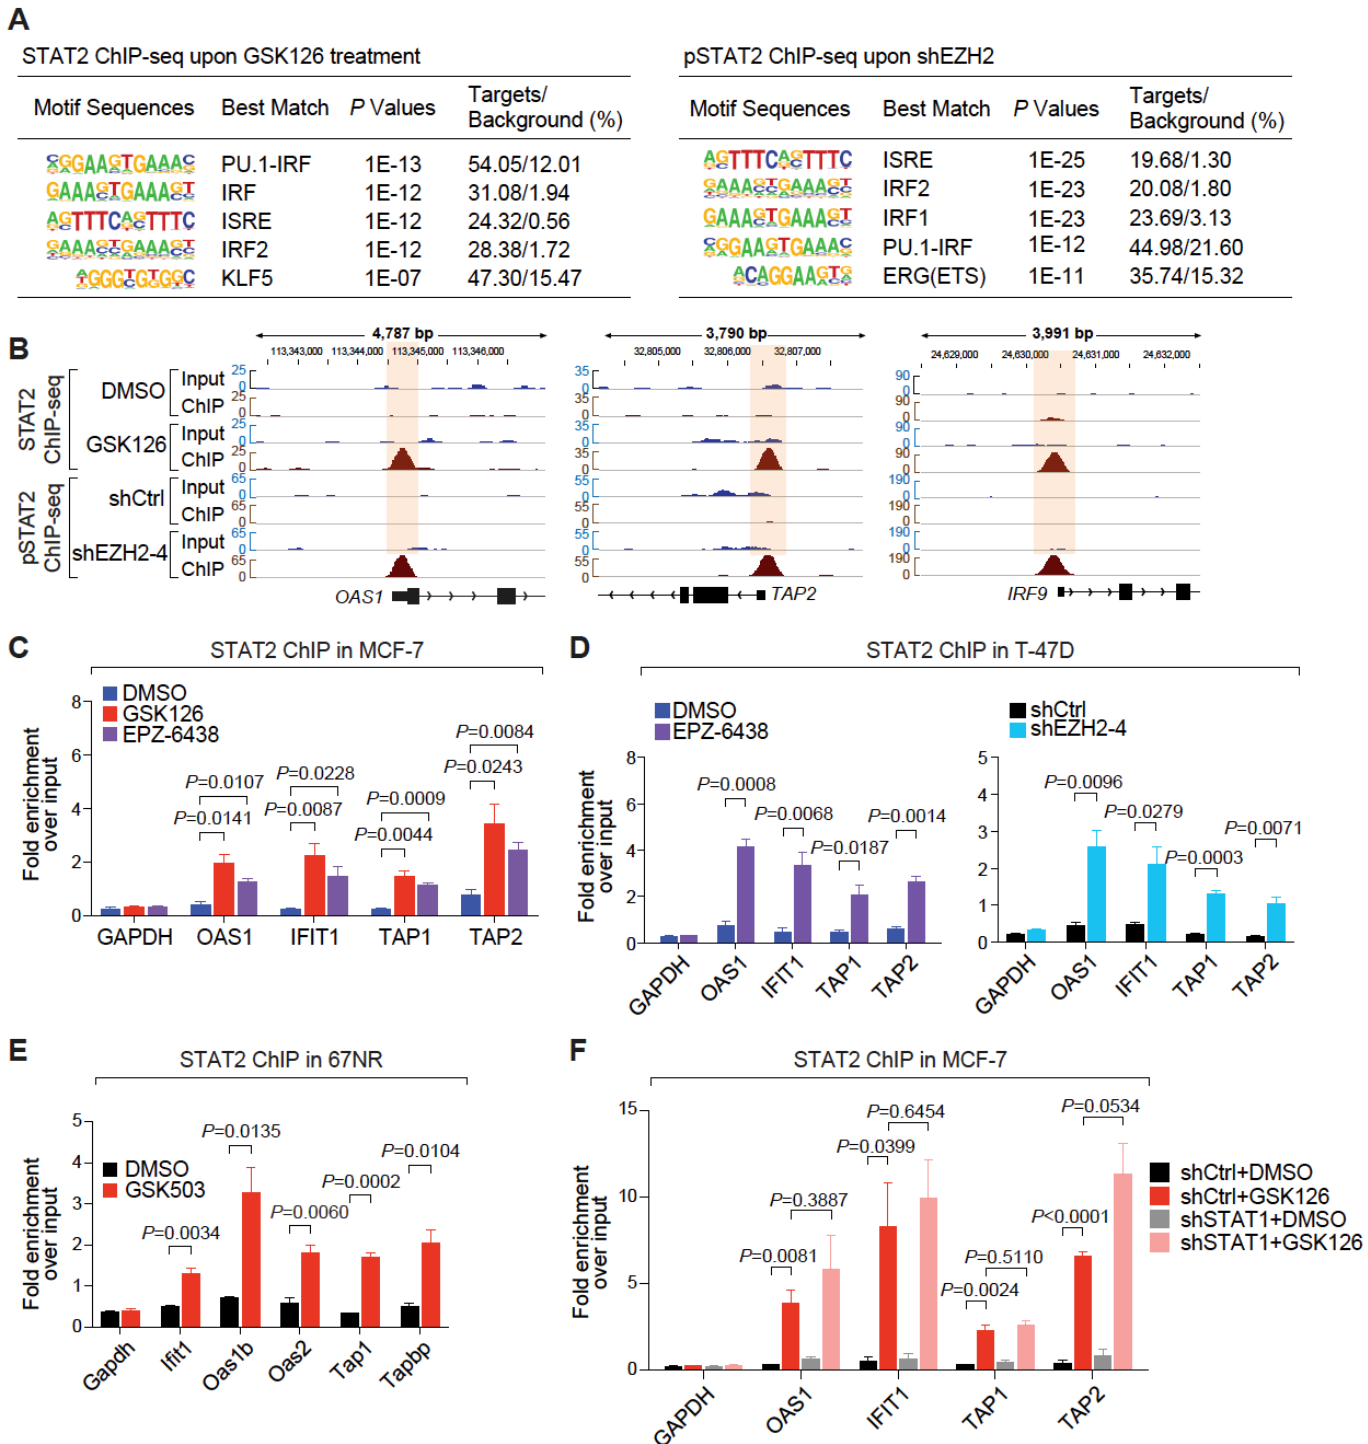

**Fig. S8. STAT2 is recruited to the classical interferon-sensitive response element (ISRE) upon EZH2 inhibition in ER $\alpha$ + breast cancer cells.** (A) Motifs enriched in the chromatin regions bound by total STAT2 upon GSK126 treatment (left panel) or the phosphorylated STAT2 (pSTAT2) upon EZH2 knockdown (shEZH2, right panel). (B) Snapshots of Integrative Genomics Viewer (IGV) showing the input and ChIP-seq signals of total STAT2 and phosphorylated STAT2 (pSTAT2) at the promoters of representative ISGs under control (DMSO or shCtrl) and experimental (GSK126 or shEZH2-4) conditions. (C-E) STAT2-targeted ChIP in MCF-7 cells treated with 5  $\mu$ M EZH2 inhibitors (GSK126 and EPZ-6438) for 7 days (C), in T-47D cells treated with 5  $\mu$ M EPZ-6438 for 8 days (left panel) or infected with control (shCtrl) and EZH2-specific (shEZH2-4) shRNA (right panel) (D), or in 67 NR cells treated with 10  $\mu$ M GSK503 for 8 days (E). (F) ChIP of STAT2 in control (shCtrl) and STAT1-knockdown (shSTAT1) MCF-7 cells in the presence of DMSO or 5  $\mu$ M GSK126 for 7 days.



**Table S1. Primers for construction of sgRNA-expressing plasmids.**

| Names   | Primer Sequence                                                      |
|---------|----------------------------------------------------------------------|
| sgCtrl  | 5'-CACCGGAATAGCTCAGAGGCCGAGG-3'<br>5'- AAACCCTCGGCCTCTGAGCTATTCC-3'  |
| sgEzh2  | 5'-CACCG GTGGTGGATGCAACCCGAAA-3'<br>5'-AAACTTTCGGGTTGCATCCACCACC-3'  |
| sgStat2 | 5'- CACCGGCTGGGCAGTGATGACGCCA-3'<br>5'- AAACTGGCGTCATCACTGCCCAGCC-3' |

**Table S2. Antibodies used in CyTOF.**

| Names of Antibodies                            | Vendor   | Catalog Numbers |
|------------------------------------------------|----------|-----------------|
| 174 Yb Monoclonal anti-mouse Ly-6G/C (RB6-8C5) | Fluidigm | 3174008B        |
| 141Pr Monoclonal anti-mouse Ly-6G (1A8)        | Fluidigm | 3141008B        |
| 142Nd Monoclonal anti-mouse CD11c (N418)       | Fluidigm | 3142003B        |
| 145Nd Monoclonal anti-mouse CD4 (RM4-5)        | Fluidigm | 3145002B        |
| 146Nd Monoclonal anti-mouse CD8a (53-6.7)      | Fluidigm | 3146003B        |
| 147Sm Monoclonal anti-mouse CD45 (30-F11)      | Fluidigm | 3147003B        |
| 148Nd Monoclonal anti-mouse CD11b (M1/70)      | Fluidigm | 3148003B        |
| 152Sm Monoclonal anti-mouse CD3e (145-2C11)    | Fluidigm | 3152004B        |
| 159Tb Monoclonal anti-mouse F4/80 (BM8)        | Fluidigm | 3159009B        |
| 162Dy Monoclonal anti-mouse Ly-6C (HK1.4)      | Fluidigm | 3162014B        |
| 169Tm Monoclonal anti-mouse CD206 (C068C2)     | Fluidigm | 3169021B        |
| 166Er Monoclonal anti-mouse CD326 (G8.8)       | Fluidigm | 3166014B        |
| 176Yb Monoclonal anti-mouse B220 (RA3-6B2)     | Fluidigm | 3176002B        |
| 150Nd Monoclonal anti-mouse CD25 (3C7)         | Fluidigm | 3150002B        |
| 158Gd Monoclonal anti-mouse Foxp3 (FJK-16s)    | Fluidigm | 3158003A        |
| 153Eu Monoclonal anti-mouse CD335 (29A1.4)     | Fluidigm | 3153006B        |

**Table S3. Primers for RT-qPCR.**

| Gene Names    | Primer Sequence                                                 |
|---------------|-----------------------------------------------------------------|
| Human genes   |                                                                 |
| <i>B2M</i>    | 5'-GAGGCTATCCAGCGTACTCCA-3'<br>5'-CGGCAGGCATACTCATCTTTT-3'      |
| <i>HLA-A</i>  | 5'-AGTTGAGAGCCTACCTGGAT-3'<br>5'-TGGTGGGTCATATGTGTCTTG-3'       |
| <i>HLA-B</i>  | 5'-GACACTGAGCTTGTGGAGAC-3'<br>5'-GGCATGTGTATCTCTGCTCTT-3'       |
| <i>HLA-C</i>  | 5'-CTGGACAAGAGCAGAGATACAC-3'<br>5'-AGCAACGATGCCCATGAT-3'        |
| <i>TAP1</i>   | 5'-GGACAAGAGCCACAGGTATTT-3'<br>5'-CAGCTGTGATTTCCTCCATAGT-3'     |
| <i>TAP2</i>   | 5'-CAGGACCAGGTGAACAACAA-3'<br>5'-CAGCAAGGACAAGGAAGAAGA-3'       |
| <i>CXCL9</i>  | 5'-CCAGTAGTGAGAAAGGGTCCG-3'<br>5'-AGGGCTTGGGGCAAATTGTT-3'       |
| <i>CXCL10</i> | 5'-CCATTCTGATTTGCTGCCTTATC-3'<br>5'- TACTAATGCTGATGCAGGTACAG-3' |
| <i>CXCL11</i> | 5'-AGCCTTGGCTGTGATATTGT-3'<br>5'-GGGTACATTATGGAGGCTTTCT-3'      |
| <i>IRF1</i>   | 5'-CAAGGCCAAGAGGAAGTCAT-3'<br>5'-CATGTAGCCTGGAAGTGTGTAG-3'      |
| <i>IRF2</i>   | 5'-CTTCTATGCAGAAAGCGAAAC-3'<br>5'-CATGTTGCTGAGGTACTGTTTG-3'     |
| <i>IRF7</i>   | 5'-GTGTGTCTTCCCTGGATAGC-3'<br>5'-GCTGCTCCAGCTCCATAAG-3'         |
| <i>IRF9</i>   | 5'-ATGTTGCTGAGCCCTACAAG-3'<br>5'-ACTGTGCTGTCGCTTTGAT-3'         |
| <i>STAT1</i>  | 5'-CACCTACGAACATGACCCTAT-3'<br>5'-GCTGTCTTTCCACCACAAAC-3'       |
| <i>STAT2</i>  | 5'-CCCTCCCTGTGGTGATTATTT-3'<br>5'-AGAAGTCTGGTTCTGAAGG-3'        |
| <i>IFIT1</i>  | 5'-CGCCTGGATGGCTTTAAATTAG-3'<br>5'-CAGGGCAAGGAGAACCTTAATA-3'    |
| <i>IFIT2</i>  | 5'-ACTATGCCTGGGTCTACTATCA-3'<br>5'-TCAAGCTCTGGACTCTCAATTC-3'    |
| <i>IFIT3</i>  | 5'-CCATTGAGCTGAGTCCTGATAA-3'<br>5'-GCTTCTTCAACAAACTGCTCTC-3'    |
| <i>IFIT5</i>  | 5'-CCAACATGTACGCTGAAGGA-3'<br>5'-GGCCATAGTGGTAATGGATCTG-3'      |
| <i>SP100</i>  | 5'- GTGAGGTGTGCAACAAATGG -3'<br>5'- AACTCCACGGGTTCTTGTTAG -3'   |
| <i>OAS1</i>   | 5'-CAGTTGACTGGCGGCTATAA-3'<br>5'-TGTGAAGCAGGTGGAGAAC-3'         |
| <i>OAS2</i>   | 5'-GGAGCTTCCCTGATTGGCAGA-3'<br>5'-ATGTAGGGTGGCAAGCACTG-3'       |
| <i>IFNA1</i>  | 5'-AATTCTGCACCGAACTCTACC-3'<br>5'-ATGGAGTCCGCATTCATCAG-3'       |
| <i>IFNB1</i>  | 5'-GCTTCTCCACTACAGCTCTTTC-3'<br>5'-CAGTATTCAAGCCTCCCATTCA-3'    |

|               |                                                                   |
|---------------|-------------------------------------------------------------------|
| <i>GAPDH</i>  | 5'-TGCACCACCAACTGCTTAGC-3' (3)<br>5'-GGCATGGACTGTGGTCATGAG-3' (3) |
| Mouse genes   |                                                                   |
| <i>H2d1</i>   | 5'-CCTCACTTCCACACTGAGAATAA-3'<br>5'-CATGTGGTTGCTGGGATTTG-3'       |
| <i>H2k1</i>   | 5'-CCTCATTCTCTAGCGTGAAGAC-3'<br>5'-CACAGGGAACATCAGACACTT-3'       |
| <i>Tap1</i>   | 5'-GGACTTGCCTTGTTCCGAGAG-3'<br>5'-GCTGCCACATAACTGATAGCGA-3'       |
| <i>Tap2</i>   | 5'-CTGGCGGACATGGCTTACTT-3'<br>5'-CTCCCACTTTTAGCAGTCCCC-3'         |
| <i>Stat1</i>  | 5'-GCTGCCTATGATGTCTCGTTT-3'<br>5'-TGCTTTTCCGTATGTTGTGCT-3'        |
| <i>Stat2</i>  | 5'-TCCTGCCAATGGACGTTTCG-3'<br>5'-GTCCCACTGGTTCAGTTGGT-3'          |
| <i>Ifit1</i>  | 5'-CACCAGTATGAAGAAGCAGAGAG-3'<br>5'-GCCATAGCGGAGGTGAATATC-3'      |
| <i>Oas1b</i>  | 5'-CTTCCTGAACTGTCGCCCAA-3'<br>5'-GACTCCCACTACTCCAGGCAT-3'         |
| <i>Oas2</i>   | 5'-CTGAGTCACCTGCACCATATT-3'<br>5'-GCTGGAGAAAGTCCTTGATGA-3'        |
| <i>Cxcl9</i>  | 5'-GAGCAGTGTGGAGTTCGAGG-3'<br>5'-TCCGGATCTAGGCAGGTTTG-3'          |
| <i>Cxcl11</i> | 5'-GGCTTCCTTATGTTCAAACAGGG-3'<br>5'-GCCGTTACTCGGGTAAATTACA-3'     |
| <i>Gapdh</i>  | 5'-TGCACCACCAACTGCTTAGC-3' (3)<br>5'-GGCATGGACTGTGGTCATGAG-3' (3) |

**Table S4. Primers for ChIP-qPCR.**

| Gene Names         | Primer Sequence                                                      |
|--------------------|----------------------------------------------------------------------|
| <b>Human genes</b> |                                                                      |
| GAPDH              | 5'-TACTAGCGGTTTTACGGGCG-3' (4)<br>5'-TCGAACAGGAGGAGCAGAGAGCGA-3' (4) |
| KIAA0066           | 5'-GCCCCAAACAGGAGTAATGA-3' (5)<br>5'-CTAGGAGGGTGGAGGTAGGG-3' (5)     |
| IFIT1              | 5'-TAGGTTTCCAACCTTGCAAGG-3'<br>5'-GCTCCTCTGAGATCTGGCTA-3'            |
| OAS1               | 5'-GTCAGCAGAAGAGATAAAAGCAAAC-3'<br>5'-GGTATTTCTGAGATCCATCATTGAC-3'   |
| TAP1               | 5'-GCGAGAAGCTCAGCCATTTA-3'<br>5'-TGATTTCCACGCTTGCTACC-3'             |
| TAP2               | 5'-CAGCTTTCGCTTTCGCTTC-3'<br>5'-GTACAGTGCGAACCAGAGTT-3'              |
| A                  | 5'-CCTGTTCACCCTGATGATTGA-3'<br>5'-CATTGGCATGGGCAAAGATT -3'           |
| B                  | 5'-GGCTAATGACAGCCCATATGTA-3'<br>5'-GGTGCTGTGATTGGAGGAAT-3'           |
| C                  | 5'-GAGAGATCAATCTGGGCTCAAC-3'<br>5'-CCATCCACAGATCCTGTCATTC-3'         |
| D                  | 5'-CTGCTTCTGAGACCATCACTTT-3'<br>5'-CTAGCAGAATTCCTCCTTCTTC-3'         |
| E                  | 5'-TGTTGAATAAGAGCGGTGAGAG-3'<br>5'-TGATAAACCCACAGCCACTATC-3'         |
| <b>Mouse genes</b> |                                                                      |
| Gapdh              | 5'-GGGTTCTATAAATACGGACTGC-3'<br>5'-CTGGCACTGCACAAGAAGA-3'            |
| Ifit1              | 5'-GTTTCAGAGCCTTCTCCTCATC-3'<br>5'-CTGCAGTTTATCCAGGGAGAC-3'          |
| Oas1b              | 5'-ACCTGTTCAGAAGCCCTAAC-3'<br>5'-GGGACTTTCAGTTTCCATTTCC-3'           |
| Oas2               | 5'-TGTC AATTGTCGAGGCAGAG-3'<br>5'-CTAGGCTTGGCTGTGTTAGG-3'            |
| Tap1               | 5'-GAGCAAGCCAGTCTCAGAAG-3'<br>5'-TGGTGGAGCTGACTAGAAGT-3'             |
| Tapbp              | 5'-AGACTTGGTAGGAGAGATCGTAG-3'<br>5'-CCCAGTGTGTCTATTCCTAAACAA-3'      |

**Table S5. Details of the 53 signature genes reflecting the repressive activity of EZH2.**

| Gene Names       | Log <sub>2</sub> FC | P values    | TSS to the nearest H3K27me3 peak (bp) |
|------------------|---------------------|-------------|---------------------------------------|
| <i>ABCA6</i>     | 2.945315214         | 0.003445449 | 0                                     |
| <i>ADCY5</i>     | 2.63778093          | 6.5353E-142 | 60                                    |
| <i>ASCL1</i>     | 3.225927209         | 9.7432E-121 | 1073                                  |
| <i>ATP10D</i>    | 3.072490052         | 1.75508E-05 | 677                                   |
| <i>BDKRB1</i>    | 4.038391276         | 0.000150199 | 123                                   |
| <i>BDKRB2</i>    | 2.920438774         | 1.06851E-24 | 2028                                  |
| <i>CD36</i>      | 4.653379002         | 3.47581E-91 | 4598                                  |
| <i>CDC20B</i>    | 3.942614188         | 0.002856067 | 637                                   |
| <i>CDH12</i>     | 4.960269697         | 4.69059E-06 | 770                                   |
| <i>CMPK2</i>     | 4.675406182         | 5.95433E-18 | 502                                   |
| <i>CSMD3</i>     | 2.984779359         | 4.30563E-08 | 0                                     |
| <i>CYP1A1</i>    | 4.641186558         | 1.05408E-10 | 824                                   |
| <i>DACHI</i>     | 4.592392111         | 6.45473E-15 | 53                                    |
| <i>EMX1</i>      | 3.917370947         | 9.5903E-05  | 610                                   |
| <i>ETV7</i>      | 3.622805694         | 3.444E-07   | 560                                   |
| <i>FAM71D</i>    | 3.090837783         | 0.023754337 | 0                                     |
| <i>FRMPD1</i>    | 2.433428599         | 0.000844062 | 417                                   |
| <i>GALNT13</i>   | 2.541506311         | 1.38171E-05 | 676                                   |
| <i>GJA1</i>      | 2.504887959         | 2.20531E-45 | 666                                   |
| <i>GPRIN3</i>    | 3.499509498         | 1.30533E-05 | 0                                     |
| <i>HDAC9</i>     | 3.940671228         | 6.14563E-22 | 0                                     |
| <i>HLA-DPA1</i>  | 3.826057675         | 1.6912E-09  | 2570                                  |
| <i>HLA-DPB1</i>  | 2.912268572         | 0.000101477 | 1919                                  |
| <i>KCNE4</i>     | 4.857152867         | 6.7068E-14  | 0                                     |
| <i>KCNH1</i>     | 2.794829645         | 1.88863E-15 | 380                                   |
| <i>KCNK2</i>     | 3.452193297         | 6.35799E-26 | 1863                                  |
| <i>LIN7A</i>     | 2.604184113         | 2.82957E-35 | 0                                     |
| <i>LINC01686</i> | 3.040355764         | 0.010208757 | 131                                   |
| <i>LMO3</i>      | 3.108768145         | 0.008695737 | 669                                   |
| <i>LUM</i>       | 3.888066469         | 0.001537068 | 276                                   |
| <i>LUZP2</i>     | 3.79158805          | 0.000507397 | 0                                     |
| <i>MAPK4</i>     | 3.494598738         | 0.012737004 | 712                                   |
| <i>MMP13</i>     | 2.797354256         | 0.026108682 | 2606                                  |
| <i>PAK6</i>      | 2.728607543         | 0.036395432 | 314                                   |
| <i>PGLYRP4</i>   | 2.387577111         | 0.0002202   | 1313                                  |
| <i>PSMB8</i>     | 4.853351488         | 2.14445E-37 | 596                                   |
| <i>PSMB8-AS1</i> | 3.384103439         | 0.000103082 | 0                                     |
| <i>PSMB9</i>     | 4.118465719         | 9.06787E-23 | 608                                   |
| <i>RGS16</i>     | 3.189265613         | 2.17066E-37 | 481                                   |
| <i>RHBDL3</i>    | 3.634653625         | 0.000913816 | 0                                     |
| <i>RSAD2</i>     | 4.154082231         | 4.04855E-05 | 237                                   |
| <i>SI00A7</i>    | 3.962299778         | 2.98989E-57 | 2162                                  |

|                |             |             |      |
|----------------|-------------|-------------|------|
| <i>SI00A8</i>  | 3.406566147 | 4.2615E-118 | 3522 |
| <i>SLC5A8</i>  | 2.780913529 | 8.6222E-39  | 427  |
| <i>STAT1</i>   | 2.376463544 | 0           | 1258 |
| <i>TAP1</i>    | 2.803419191 | 3.4357E-178 | 798  |
| <i>TAP2</i>    | 3.2443403   | 1.7221E-300 | 4783 |
| <i>TSPAN2</i>  | 3.244236242 | 1.57098E-07 | 19   |
| <i>TSPAN5</i>  | 2.67139504  | 9.67101E-62 | 0    |
| <i>UBE2QL1</i> | 2.656479195 | 0.001048391 | 420  |
| <i>UNC5C</i>   | 3.46687006  | 5.15203E-14 | 894  |
| <i>VNN3</i>    | 4.568806072 | 0.000126515 | 2696 |
| <i>WNT10B</i>  | 2.537059331 | 1.39555E-06 | 164  |

Notes:

1. Log<sub>2</sub>FC, log<sub>2</sub>-transformed fold change between the expression of corresponding gene in EZH2-knockdown MCF-7 cells and the control cells.
2. TSS, transcription start site
3. bp, base pair.

## References

1. Cancer Genome Atlas N. Comprehensive molecular portraits of human breast tumours. *Nature* **2012**;490:61-70
2. Curtis C, Shah SP, Chin SF, Turashvili G, Rueda OM, Dunning MJ, *et al.* The genomic and transcriptomic architecture of 2,000 breast tumours reveals novel subgroups. *Nature* **2012**;486:346-52
3. Laukens D, Georges M, Libioulle C, Sandor C, Mni M, Vander Cruyssen B, *et al.* Evidence for significant overlap between common risk variants for Crohn's disease and ankylosing spondylitis. *PLoS One* **2010**;5:e13795
4. Xu K, Wu ZJ, Groner AC, He HH, Cai C, Lis RT, *et al.* EZH2 oncogenic activity in castration-resistant prostate cancer cells is Polycomb-independent. *Science* **2012**;338:1465-9
5. Varambally S, Cao Q, Mani RS, Shankar S, Wang X, Ateeq B, *et al.* Genomic loss of microRNA-101 leads to overexpression of histone methyltransferase EZH2 in cancer. *Science* **2008**;322:1695-9
